# Supplementary material for: Natural Killer Cell Receptors and Ligands Are Associated With Markers of HIV-1 Persistence in Chronically Infected ART Suppressed Patients
Source: Front Cell Infect Microbiol. 2022 Feb 10;12:757846. doi: 10.3389/fcimb.2022.757846 (PMC8866573; doi:10.3389/fcimb.2022.757846)
Supplement: Supplementary file 16 [file Table_1.xlsx]

## Sheet: Sheet1
Supplemental table 1. CyTOF staining panel for NK cell receptors and phenotyping markers
Isotope	Antibody target	Source	Clone	Catalog number	Surface or intracellular
89Y	CD57	Biolegend	HCD57	322302	Surface
112Cd Qdot	HLA-DR	Life technologies	Tu36	Q22158	Surface
115In	CD3	Biolegend	UCHT1	300402	Surface
141Pr	CD38	Biolegend	HIT2	303502	Surface
142Nd	CD69	Biolegend	FN50	310902	Surface
143Nd	CD33	Biolegend	WM53	303402	Surface
143Nd	CD14	Biolegend	M5E2	301802	Surface
144Nd	CD2	Biolegend	RPA-2.10	300202	Surface
145Nd	LILRB1	R&D systems	292319	MAB20172	Surface
146Nd	CD19	Biolegend	HIB19	302202	Surface
147Sm	CD8	Biolegend	SK1	344702	Surface
148Nd	FcRg	Millipore	polyclonal	06-727	Intracellular
149Sm	CD4	Biolegend	SK3	344602	Surface
150Nd	Syk	Biolegend	4D10.2	644302	Intracellular
151Eu	CD62L	Biolegend	DREG-56	304802	Surface
152Sm	Ki-67	Biolegend	Ki-67	350502	Intracellular
153Eu	KIR2DS4	R&D systems	179315	MAB1847	Surface
154Sm	KIR2DS2	Abcam	Polyclonal	ab175486	Surface
155Gd	NKp46	Biolegend	9E2	331904	Surface
156Gd	NKG2D	Biolegend	1D11	320802	Surface
157Gd	TIGIT	R&D systems	741182	MAB7898	Surface
158Gd	2B4	Biolegend	C1.7	329502	Surface
159Tb	DNAM-1	BD biosciences	DX11	559787	Surface
160Gd	FAS-L	Biolegend	NOK-1	306402	Surface
161Dy	NKp30	Biolegend	P30-15	325202	Surface
162Dy	Siglec-7	Biolegend	S7.7	347702	Surface
163Dy	NKG2C	R&D systems	134522	MAB1381	Surface
164Dy	NKp44	Biolegend	P44-8	325102	Surface
165Ho	TACTILE	Biolegend	NK92.39	338402	Surface
166Er	KIR2DL1	R&D systems	143211	MAB1844	Surface
167Er	CD94	Biolegend	DX22	305502	Surface
168Er	CXCR6	Biolegend	K041E5	356002	Surface
169Tm	PD1	Biolegend	EH12.2H7	329925	Surface
170Er	KIR2DL5	Miltenyi	UP-R1	130-096-200	Surface
171Yb	NKG2A	R&D systems	131411	MAB1059	Surface
172Tb	NTB-A	Biolegend	NT-7	317202	Surface
173Yb	KIR3DL1	BD biosciences	DX9	555964	Surface
174Yb	CD56	BD biosciences	NCAM16.2	559043	Surface
175Lu	KIR2DL3	R&D systems	180701	MAB2014	Surface
176Yb	Perforin	Abcam	B-D48	ab47225	Intracellular
209Bi	CD16	Fluidigm	3G8	3209002B	Surface
